# Supplementary material
Source: PubMed Central journal article supplement (PMC5655498)
Supplement: 10.1074_M117.796045_jbc.M117.796045-6.pdf [file 10.1074_M117.796045_jbc.M117.796045-6.pdf]

## SUPPLEMENTAL FIGURE LEGENDS

**Supplemental Figure 1. NUSAP1 mitotic localization and cell cycle regulation.** A) NUSAP1 localization through mitosis. NUSAP1 localization to the spindle during mitosis in U2OS cells. Metaphase and Anaphase images are replicated from those shown in Figure 1B. Scale bars indicate 10 $\mu$ m. B) U2OS Nocodazole release. Cells were arrested in 150ng/mL Nocodazole overnight and released by mitotic shake-off. Time points were taken every 2 hours until 10h.

**Supplemental Figure 2. RanBP2 co-precipitates with NUSAP1 in both Nocodazole and Taxol arrested cells.** U2OS cells were either arrested using 200ng/mL Nocodazole or 500nM Taxol overnight before collection. Cells were then used for endogenous NUSAP1 IP.

**Supplemental Figure 3. NUSAP1 depletion in U2OS cells does not alter RanBP2 or RanGAP1 localization.** Control and NUSAP1 depleted cells were fixed and stained with either RanBP2, Tubulin, and CENP-C or with RanGAP1, Tubulin and NUSAP1. (Scale bars indicate 10 $\mu$ M.)

**Supplemental Figure 4. NUSAP1 contains a SAP domain in its N-terminus.** A) Schematics of NUSAP1 and PIAS1 as a representation of the PIAS family members, which all contain SAP domains approximately 10 AA away from their N-termini. B) Alignment of SAP domains of NUSAP1 and four PIAS protein family members.

**Supplemental Figure 5. NUSAP1 depletion does not affect RanBP2 complex formation.** HEK-293T cells were depleted of NUSAP1 using one of two different siRNAs or a pool of siRNAs. Endogenous RanBP2 IPs were then performed, indicating RanBP2 is still able to associate with SUMOylated RanGAP1 when NUSAP1 is depleted.
