# Supplementary material
Source: PubMed Central journal article supplement (PMC5655498)

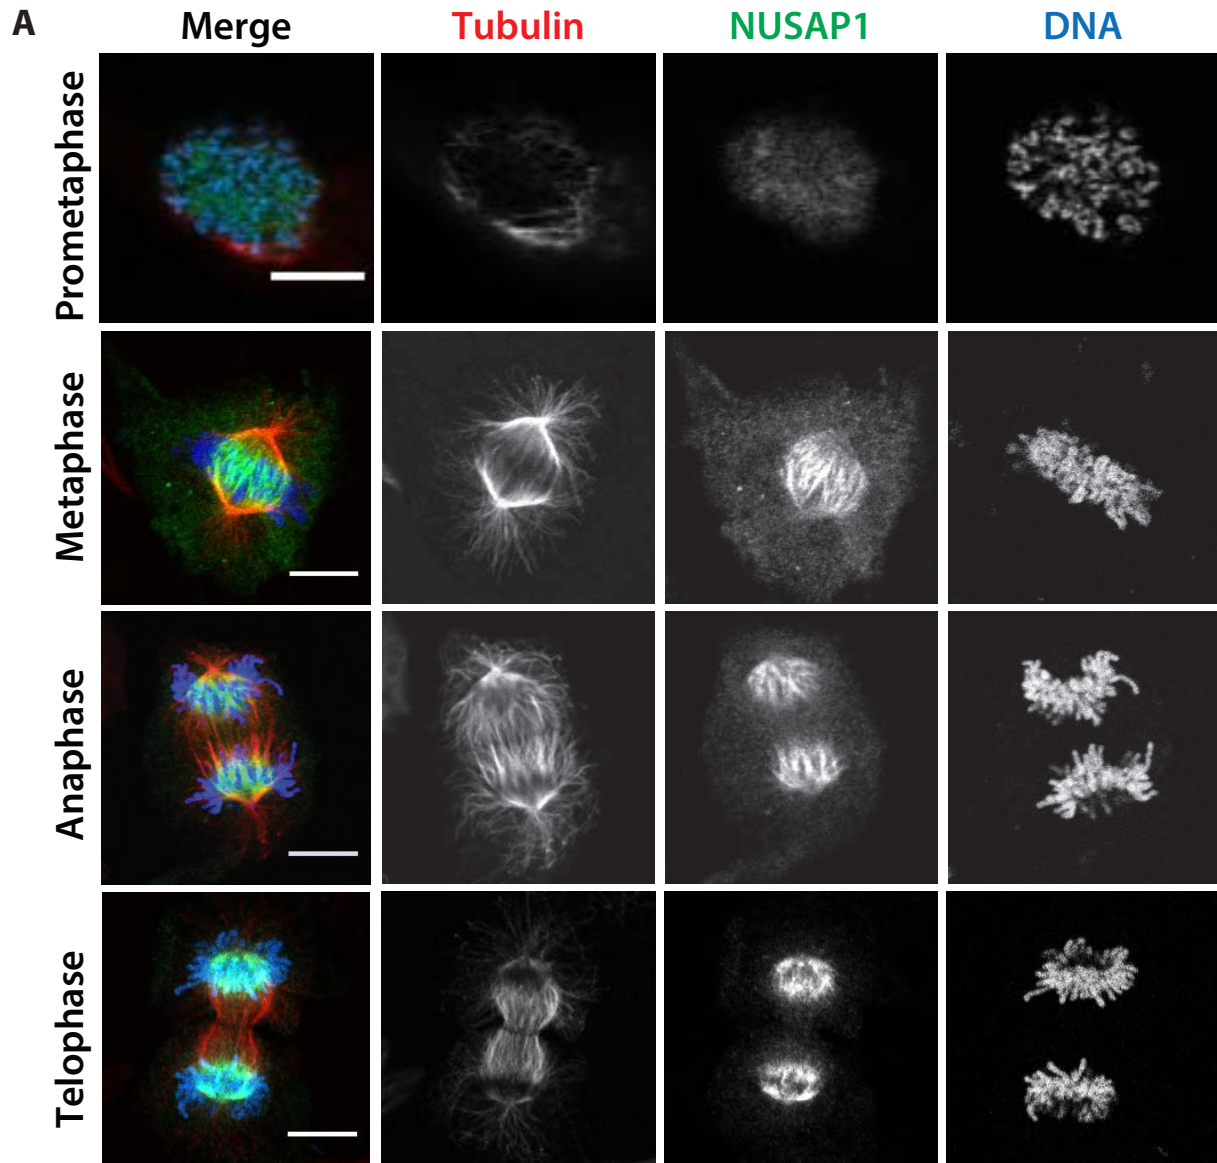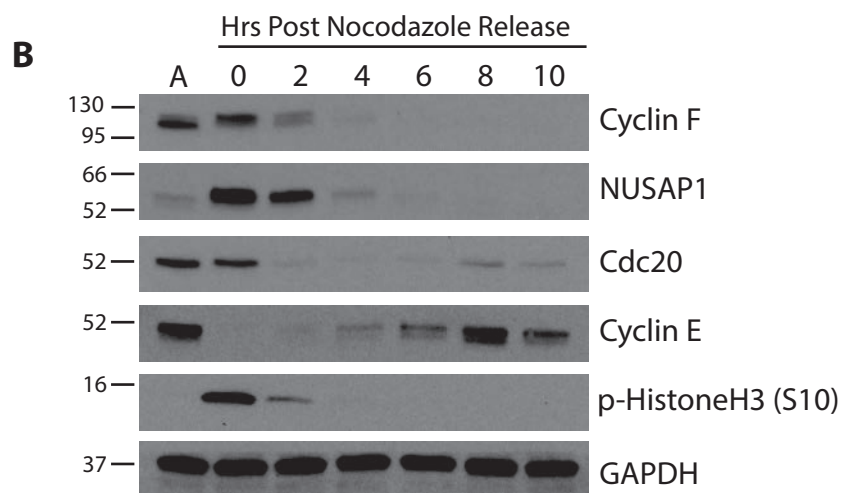

Supplement: 10.1074_M117.796045_jbc.M117.796045-1.pdf [file 10.1074_M117.796045_jbc.M117.796045-1.pdf]

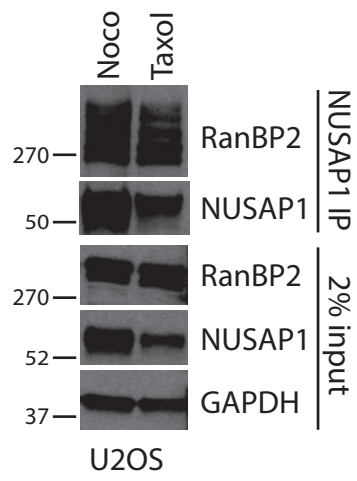

Supplement: 10.1074_M117.796045_jbc.M117.796045-2.pdf [file 10.1074_M117.796045_jbc.M117.796045-2.pdf]

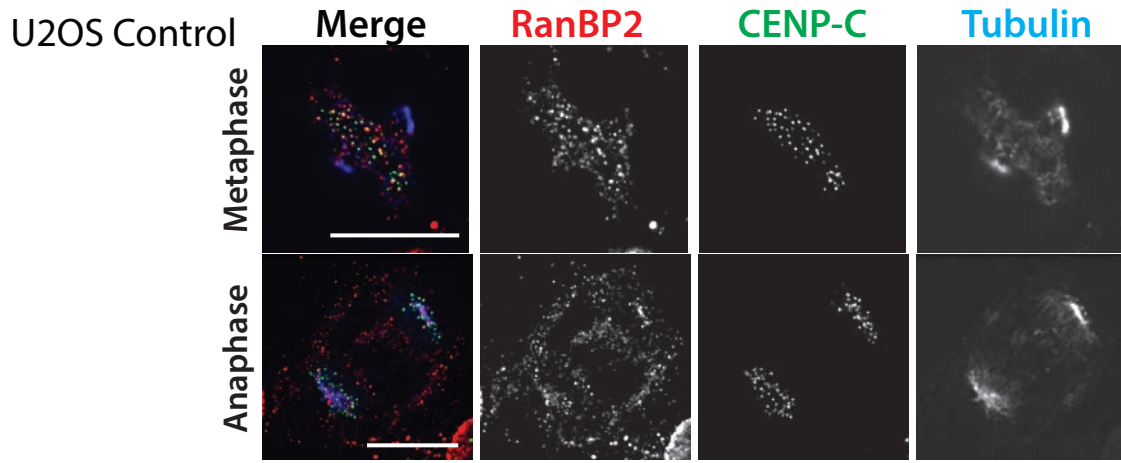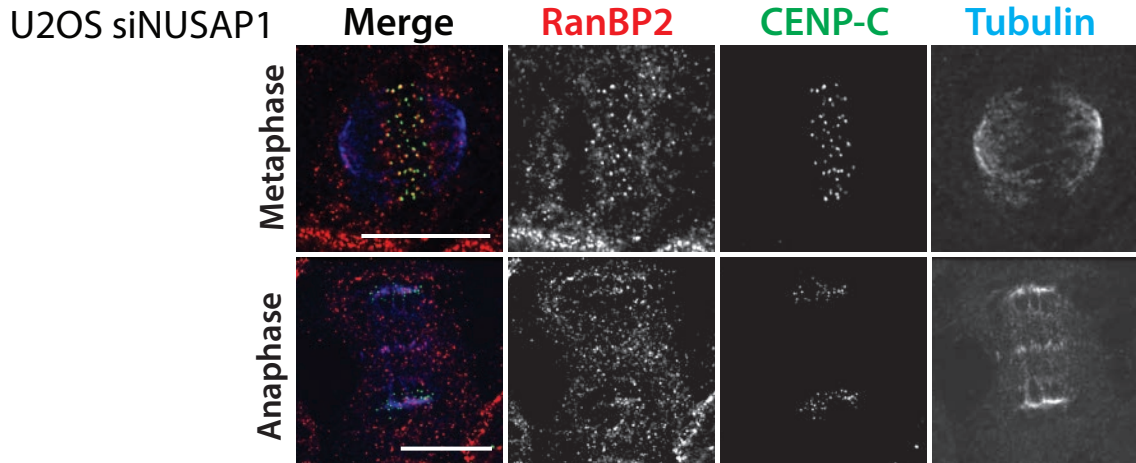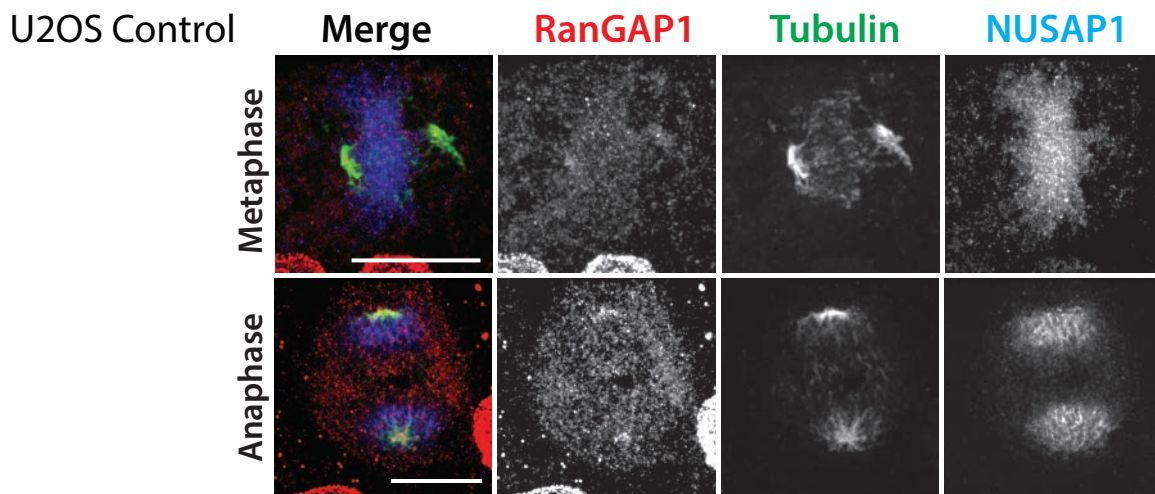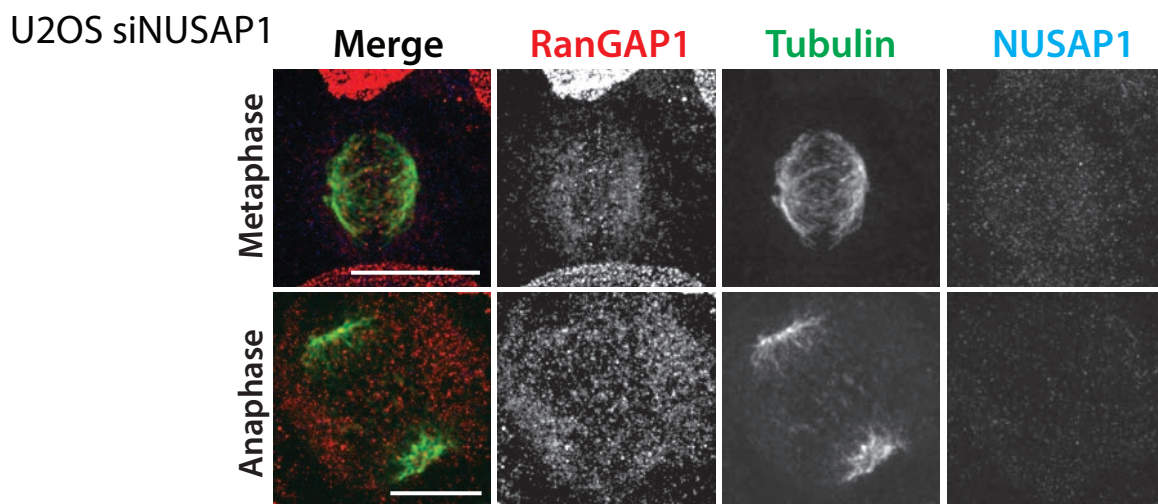

Supplement: 10.1074_M117.796045_jbc.M117.796045-3.pdf [file 10.1074_M117.796045_jbc.M117.796045-3.pdf]

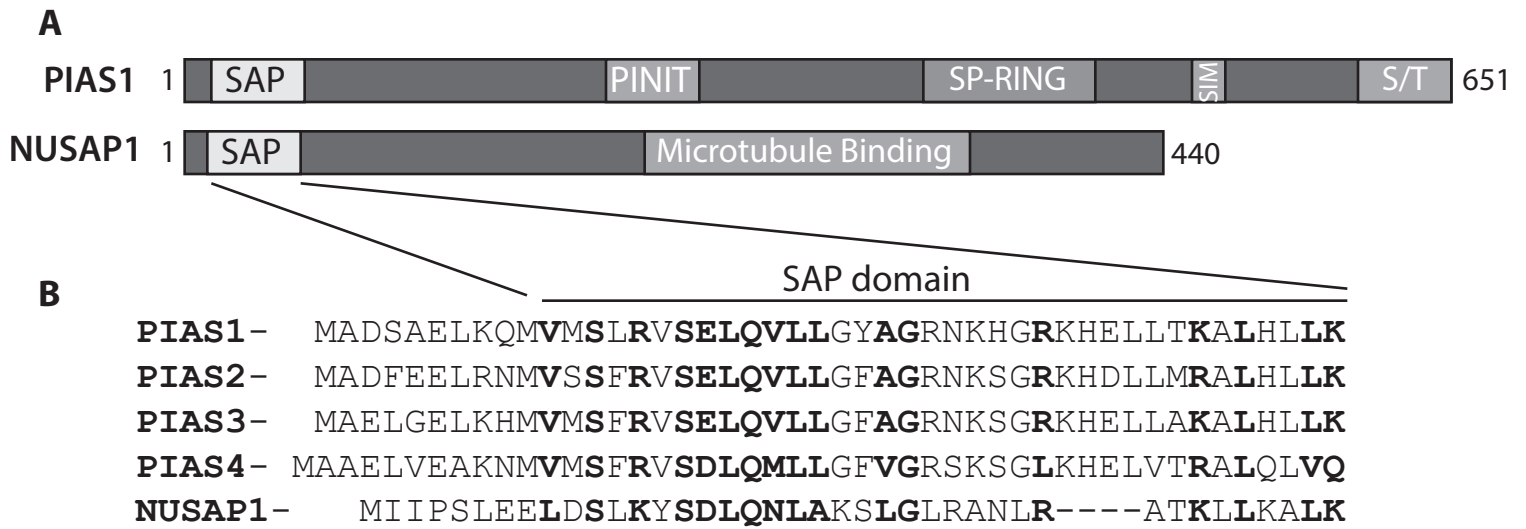

Supplement: 10.1074_M117.796045_jbc.M117.796045-4.pdf [file 10.1074_M117.796045_jbc.M117.796045-4.pdf]

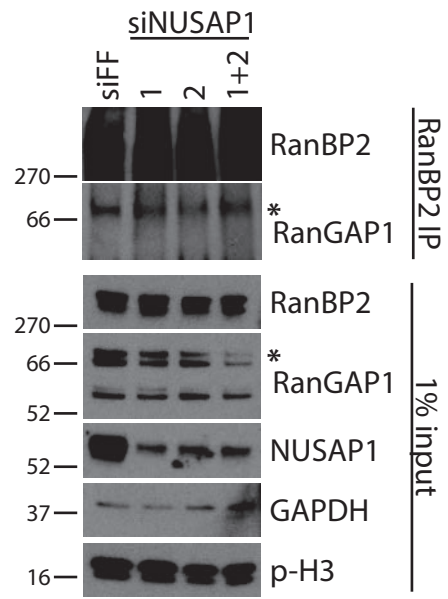

Supplement: 10.1074_M117.796045_jbc.M117.796045-5.pdf [file 10.1074_M117.796045_jbc.M117.796045-5.pdf]
